# Supplementary material for: The Effects of Foot Reflexology on Vital Signs: A Meta-Analysis of Randomized Controlled Trials
Source: Evid Based Complement Alternat Med. 2022 Sep 13;2022:4182420. doi: 10.1155/2022/4182420 (PMC9489354; doi:10.1155/2022/4182420)
Supplement: Supplementary Materials — Table S. PRISMA 2020 checklist (PRISMA for systematic review and meta-analyses). [file 4182420.f1.zip]

Archive with 2 entries (2 files):
- 4182420.f1/supplementary file 1- PRISMA.docx
- 4182420.f1/Supplementary file 2-search strategy.docx
